# Supplementary material for: Nuclear spin noise tomography in three dimensions with iterative simultaneous algebraic reconstruction technique (SART) processing
Source: Copernicus journal article supplement (doi:10.5194/mr-1-165-2020), 2020-08-06
Supplement: Supplementary file 1 [file mr-1-165-2020-supplement.zip]

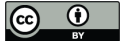

*Supplement of*

## **Nuclear spin noise tomography in three dimensions with iterative simultaneous algebraic reconstruction technique (SART) processing**

**Stephan J. Ginhör et al.**

*Correspondence to:* Norbert Müller ([norbert.mueller@jku.at](mailto:norbert.mueller@jku.at))

- [mr-1-165-2020-supplement-title-page.pdf](#)
- [preprocess.py](#)
- [reconstruct.py](#)
- [supplementary\\_material.docx](#)

The copyright of individual parts of the supplement might differ from the CC BY 4.0 License.
